# Supplementary material
Source: PubMed Central journal article supplement (PMC4164335)
Supplement: NIHMS408252-supplement-supplement_1.pdf [file NIHMS408252-supplement-supplement_1.pdf]

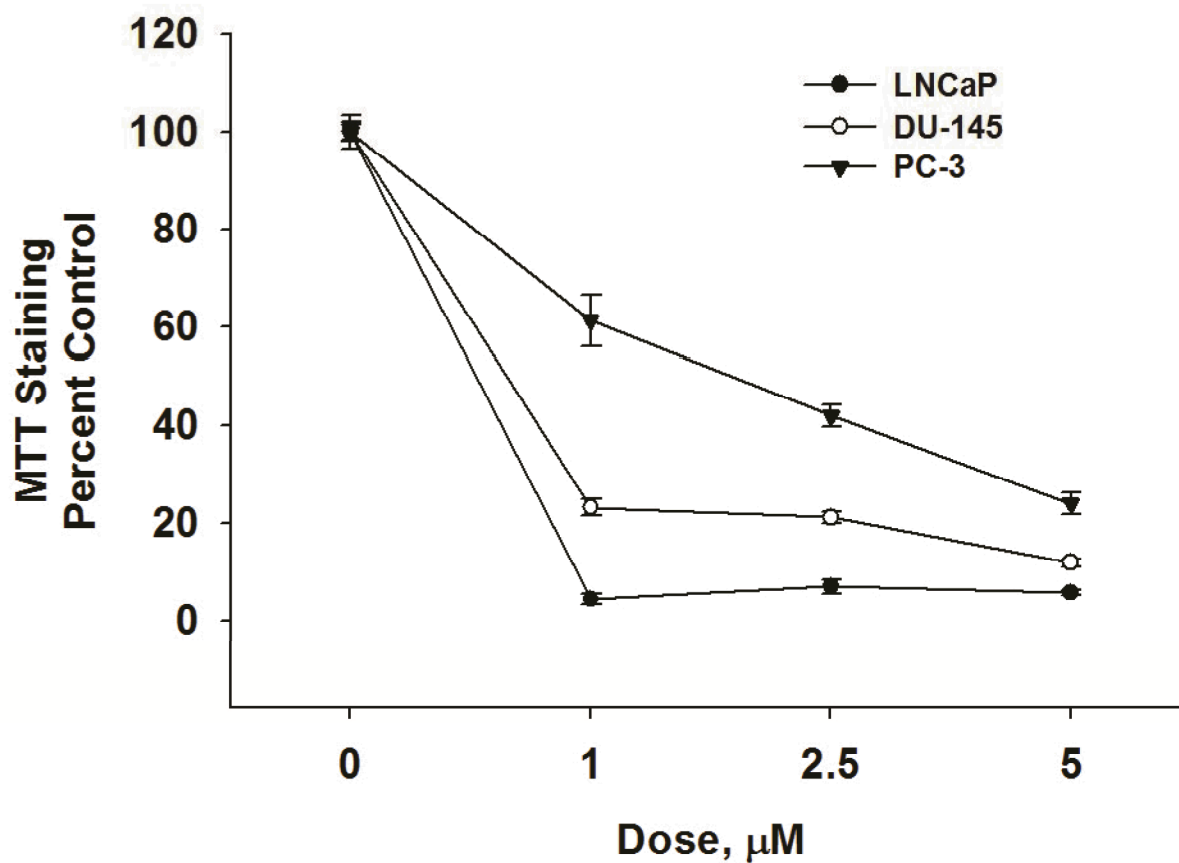

**Supplemental Figure 1.** Concentration-dependence effect of doxorubicin exposure on MTT staining in PC-3, LNCaP and DU145 cells after 72 hours. Data are presented as the mean +/- SEM of at least 3-6 different experiments.
